# Supplementary material
Source: Springer Nature journal article supplement (https://www.springerprofessional.de/resource/supplementary/13677_2013_45_MOESM17_ESM.pdf/10743474)

### Master node

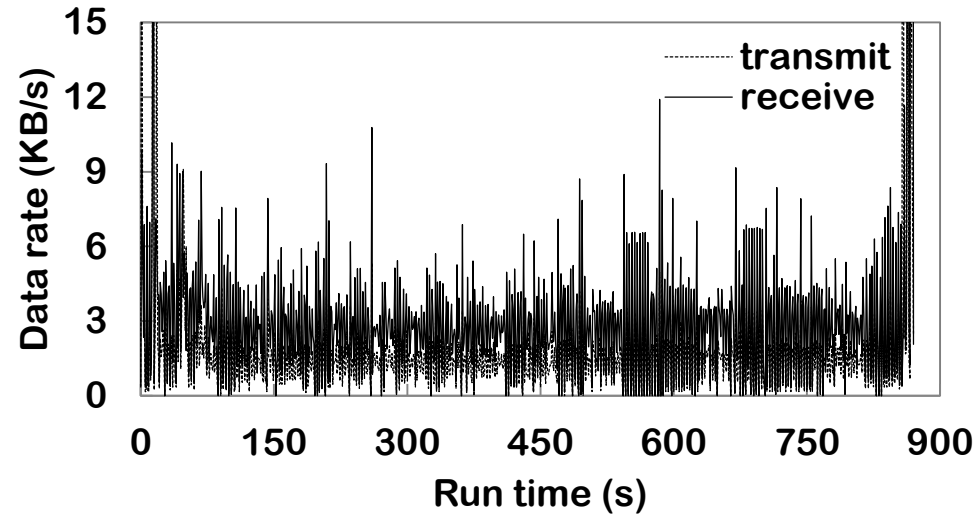

### Map node

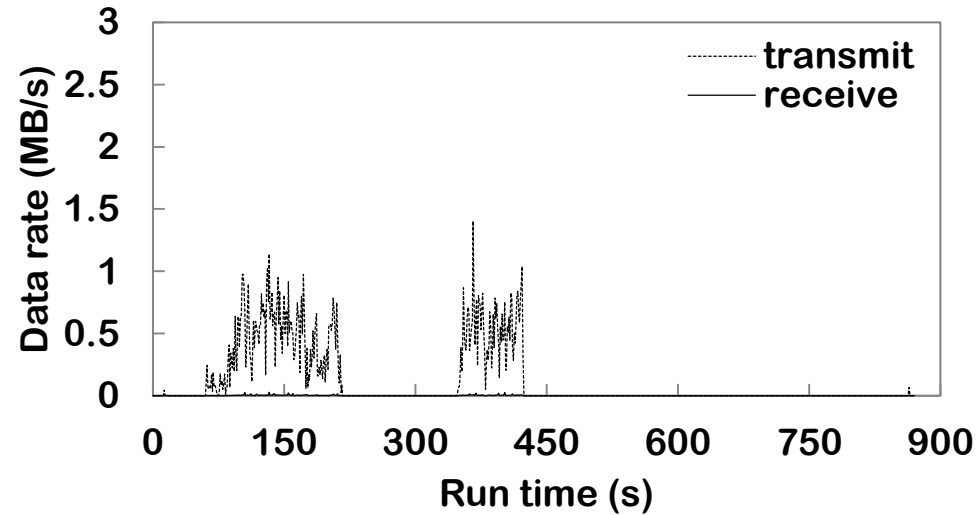

### Reduce node

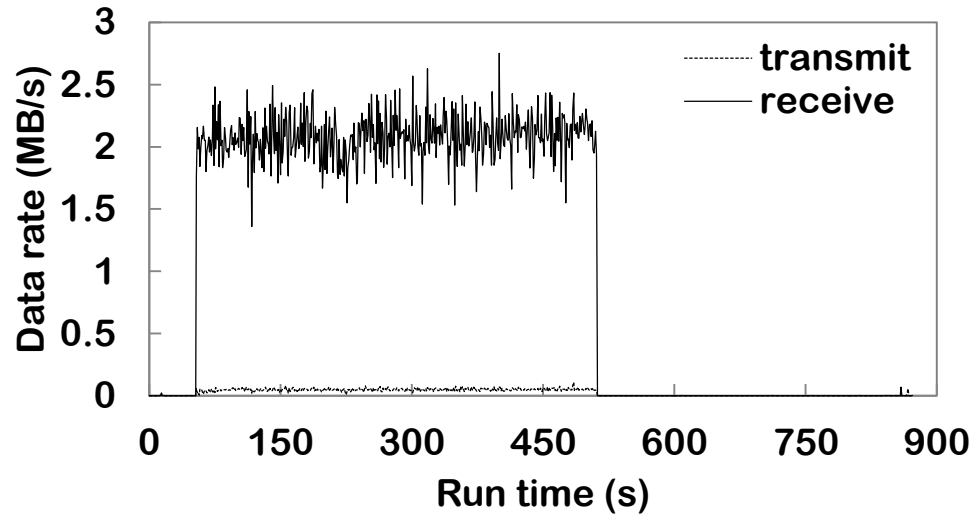

Supplement: MOESM17 [file 10743474]
